# Supplementary material
Source: PubMed Central journal article supplement (PMC4203386)

## **SUPPORTING INFORMATION**

### **Effects of Toxicologically Relevant Xenobiotics and the Lipid-Derived Electrophile 4-Hydroxynonenal on Macrophage Cholesterol Efflux: Silencing Carboxylesterase 1 Has Paradoxical Effects on Cholesterol Uptake and Efflux**

Matthew K. Ross\*, Abdolsamad Borazjani, Lee C. Mangum, Ran Wang, and J. Allen Crow\*

\* Correspondence:

Matt K. Ross, PhD

Email: [mross@cvm.msstate.edu](mailto:mross@cvm.msstate.edu)

Tel.: 662-325-5482

J. Allen Crow, MD, PhD

Email: [crow@cvm.msstate.edu](mailto:crow@cvm.msstate.edu)

Tel.: 662-325-3761

## SUPPLEMENTARY INFORMATION FIGURE LEGENDS

**Figure S1.** Cholesteryl ester (CE) mass in THP-1 macrophages incubated in culture medium containing acLDL (50  $\mu\text{g}/\text{mL}$ ) for 24 h, followed by overnight incubation in equilibration medium (i.e., no cholesterol acceptors present in media). The end of the cholesterol-loading phase is defined as time 0. CE mass was also measured after a 24-h efflux phase in which foam cells were incubated in culture medium containing the universal cholesterol acceptor, 10% FBS. Data represent the mean  $\pm$  SD of 3 dishes per group; \*  $p < 0.05$ , relative to non-acLDL loaded cells, Student's *t*-test; #  $p < 0.05$ , relative to acLDL-loaded cells at time 0, Student's *t*-test.

**Figure S2.** Cholesterol mass (CE, FC, and TC) in THP-1 macrophage foam cells (loaded with 50  $\mu\text{g}/\text{mL}$  acLDL for 24 h, followed by overnight incubation in equilibration medium) after 24-h incubation in FBS-free medium containing either vehicle (-) or ACATi (+). CE, cholesteryl esters; FC, free cholesterol; TC, total cholesterol. Data represent the mean  $\pm$  SD of 2 dishes per group.

**Figure S3.** Evidence for the knockdown of CES1 expression in THP-1 cells. (A) Immunoblot of THP-1 macrophage lysates, Control (scrambled shRNA) and CES1 KD (CES1 shRNA) cells. rCES1 indicates recombinant human CES1 protein used as a marker. CES1 and  $\beta$ -actin proteins were detected with antibodies specific for each protein. (B) Activity-based protein profiling blot of Control and CES1 KD THP-1 monocytes. Note the absence of a CES1 band in the CES1 KD cells around 60 kDa. Cathepsin (Cath) G and PPT1 designations are based on Wang et al. (2013).<sup>1</sup> rCES1 indicates recombinant human CES1 protein. (C) Esterase activities (mAbsorbance/min) of Control and CES1 KD THP-1 monocytes following treatment with increasing amounts of paraoxon. Equivalent amounts of cell lysate protein were treated with indicated amount of paraoxon or vehicle (ethanol, 0.1% v/v) for 30 min, followed by

determination of the p-nitrophenyl valerate (pNPV) hydrolysis activity.<sup>2</sup> Data represent the mean  $\pm$  SD of 3 determinations.

## REFERENCES

- 1) Wang, R., Borazjani, A., Matthews, A. T., Mangum, L. C., Edelmann, M. J., and Ross, M. K. (2013) Identification of palmitoyl protein thioesterase 1 in human THP1 monocytes and macrophages and characterization of unique biochemical activities for this enzyme. *Biochemistry* 52, 7559-7574.
- 2) Crow, J. A., Middleton, B. L., Borazjani, A., Hatfield, M. J., Potter, P. M., and Ross, M. K. (2008) Inhibition of carboxylesterase 1 is associated with cholesteryl ester retention in human THP-1 monocyte/macrophages. *Biochim. Biophys. Acta* 1781, 643-654.

SUPPLEMENTARY INFORMATION FIGURES

Supplementary Figure 1

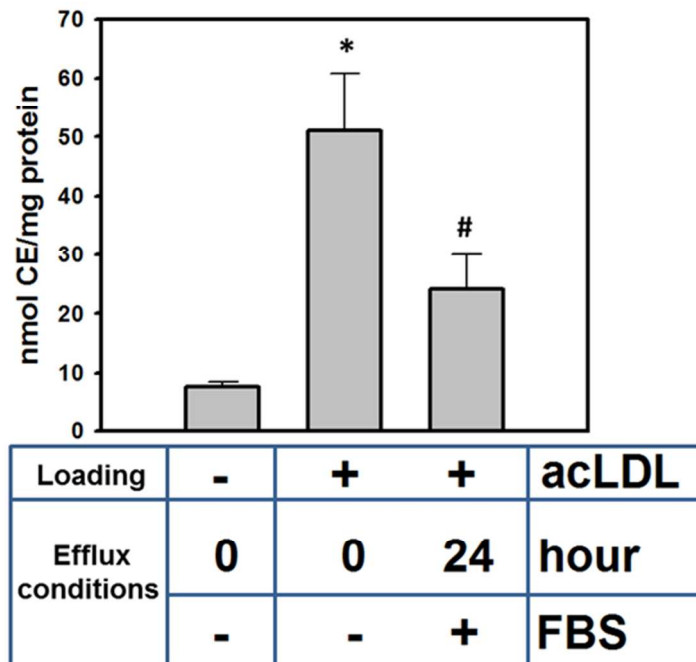

Supplementary Figure 2

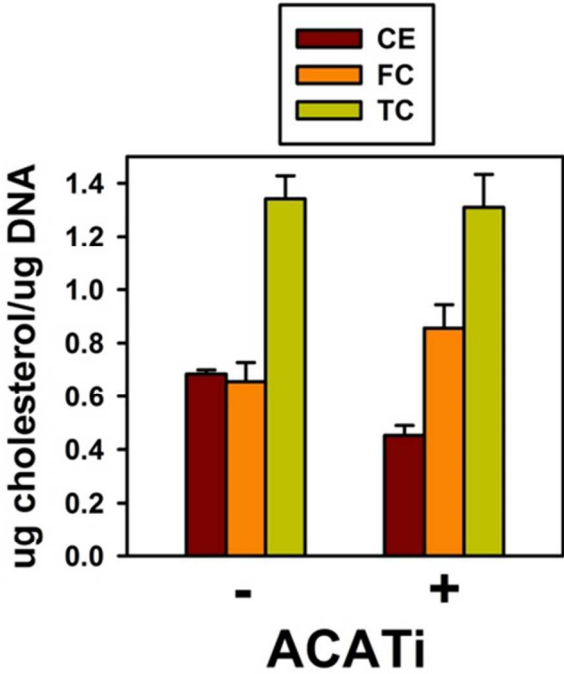

### Supplementary Figure 3

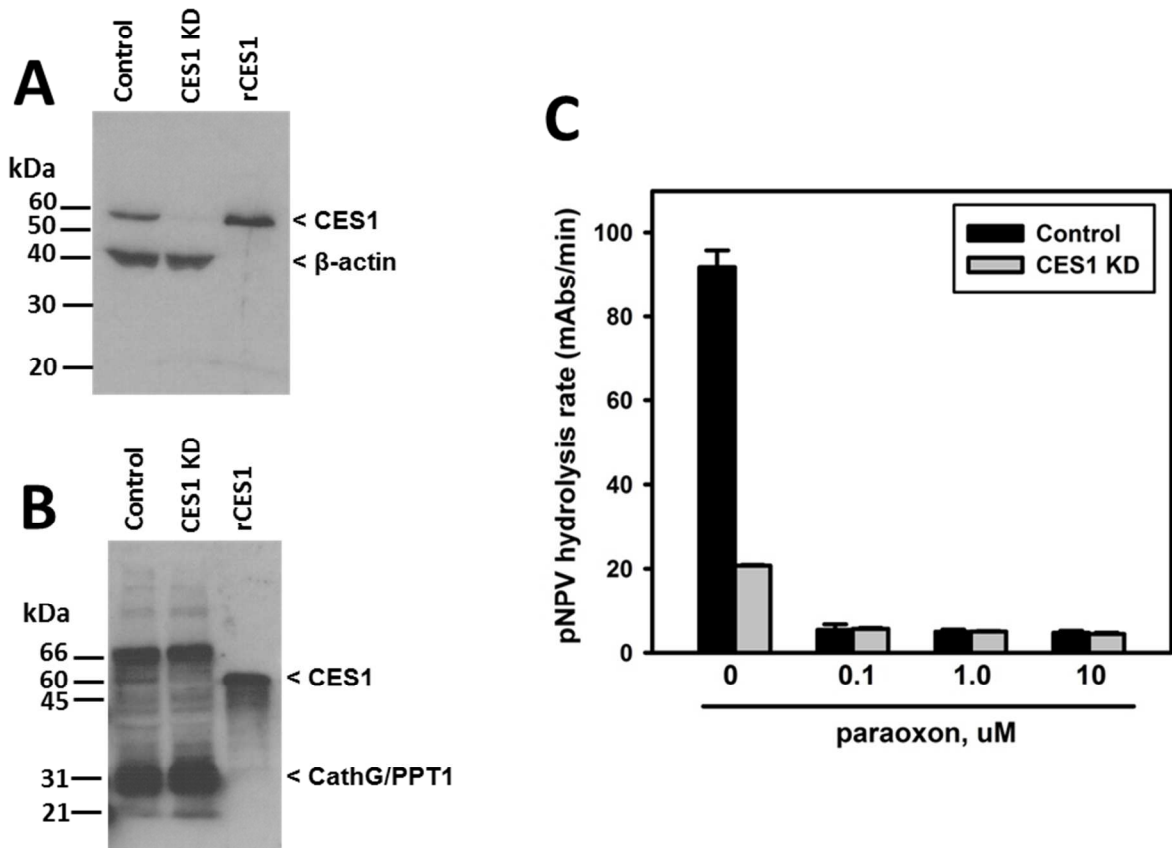

Supplement: tx500221a_si_001.pdf [file tx500221a_si_001.pdf]
